# Supplementary material for: Effect of Nocturnal Oxygen Therapy on Nocturnal Hypoxemia and Sleep Apnea Among Patients With Chronic Obstructive Pulmonary Disease Traveling to 2048 Meters: A Randomized Clinical Trial
Source: PubMed Central journal article supplement (PMC7309443; doi:10.1001/jamanetworkopen.2020.7940), 2020-06-22
Supplement: jamanetwopen-3-e207940-s003.pdf [file jamanetwopen-3-e207940-s003.pdf]

## Data Sharing Statement

Tan. Effect of Nocturnal Oxygen Therapy on Nocturnal Hypoxemia and Sleep Apnea Among Patients With Chronic Obstructive Pulmonary Disease Traveling to 2048 Meters. *JAMA Netw Open*. Published June 22, 2020. 10.1001/jamanetworkopen.2020.7940

### Data

**Data available:** Yes

**Data types:** Deidentified participant data

**How to access data:** [michael.furian@usz.ch](mailto:michael.furian@usz.ch)

**When available:** With publication

### Supporting Documents

**Document types:** None

### Additional Information

**Who can access the data:** Anonymized data underlying this study can be requested by qualified researchers providing an approved proposal.

**Types of analyses:** for any purpose

**Mechanisms of data availability:** Data will be made available only by approval of all investigators of this publication

**Any additional restrictions:** -
